# Supplementary material for: GH Supplementation Effects on Cardiovascular Risk in GH Deficient Adult Patients: A Systematic Review and Meta-analysis
Source: PubMed Central journal article supplement — Endocr Metab Immune Disord Drug Targets. 2017 Dec;17(4):285–96. doi: 10.2174/1871530317666170919121729 (PMC5925873; doi:10.2174/1871530317666170919121729), 2017-12
Supplement: EMIDDT-17-285_SD1.pdf [file EMIDDT-17-285_SD1.pdf]

# SUPPLEMENTARY MATERIAL

## GH Supplementation Effects on Cardiovascular Risk in GH Deficient Adult Patients: A Systematic Review and Meta-analysis

Vito Angelo Giagulli<sup>1,4,\*</sup>, Marco Castellana<sup>2</sup>, Raffaella Perrone<sup>3</sup>, Edoardo Guastamacchia<sup>4</sup>, Massimo Iacoviello<sup>5</sup> and Vincenzo Triggiani<sup>4</sup>

<sup>1</sup>Outpatient Clinic for Endocrinology and Metabolic Diseases, Conversano Hospital, ASL Bari Via De Amicis, 70014 Conversano, Italy; <sup>2</sup>Section of Internal Medicine., Endocrinology, Andrology and Metabolic Diseases, Department of Emergency and Organ Transplantation, University of Bari Aldo Moro, Piazza Giulio Cesare 11, 70124, Bari, Italy; <sup>3</sup>Medical Science Liaison Merck, Serono S.p.A., Rome, Italy; <sup>4</sup>Interdisciplinary Department of Medicine-Section of Internal Medicine, Geriatrics, Endocrinology and Rare Diseases, University of Bari "A. Moro", Bari, Italy; <sup>5</sup>Cardiology Unit, Cardiothoracic Department, University of Bari, School of Medicine, Policlinico, Piazza Giulio Cesare 11, 70124 Bari, Italy

### SUPPLEMENTARY DATA

Table S1. Summary of the blood pressure (BP) changes observed in the studies included in the analysis.

| Study                                   | Patients (n) | Duration (mo.) | Systolic BP at Baseline (mmHg) | Systolic BP at the end (mmHg) | p-value | Diastolic BP at Baseline (mmHg) | Diastolic BP at the end (mmHg) | p-value |
|-----------------------------------------|--------------|----------------|--------------------------------|-------------------------------|---------|---------------------------------|--------------------------------|---------|
| Elbornsson M. <i>et al.</i> [16]        | 156          | 120            | 125.80 (4.1)                   | 128.60 (2.8)                  | not sig | 78.80 (2.8)                     | 80.80 (2.3)                    | not sig |
| Filipsson Nyström H. <i>et al.</i> [10] | 60           | 4              | data not shown                 | data not shown                | not sig | data not shown                  | data not shown                 | not sig |
| Fideleff HL. <i>et al.</i> [18]         | 71           | 48             | 120.20 (2.1)                   | -3.80 (2.5)                   | not sig | 77.40 (1.6)                     | -4.00 (1.8)                    | 0.035   |
| Joaquin C. <i>et al.</i> [19]           | 14           | 12             | 111.62 (12.01)                 | 118.83 (16.54)                | not sig | 64.00 (8.00)                    | 70.71 (7.43)                   | not sig |
| Setola E. <i>et al.</i> [33]            | 31           | 6              | 116.30 (12.9)                  | 120.00 (12.5)                 | not sig | 71.30 (9.0)                     | 76.00 (5.2)                    | not sig |
| Oliveira JL. <i>et al.</i> [14]         | 20           | 6              | 118.85 (18.16)                 | 127.3 (27.76)                 | not sig | 74.55 (12.02)                   | 80.00 (10.66)                  | <0.05   |
| Borson – Chazot F. <i>et al.</i> [2]    | 22           | 12             | 115.00 (3)                     | 118.00 (4)                    | not sig | 73.00 (2)                       | 72.00 (2)                      | not sig |
| Cuneo RC. <i>et al.</i> [58]            | 163          | 12             | 120.00                         | 121.00 (2)                    | not sig | 78.00                           | 80.00 (1)                      | not sig |
| Jorgenssen JO. <i>et al.</i> [59]       | 10           | 36             | 110.00 (5)                     | 107.00 (4)                    | not sig | 71.00 (4)                       | 73.00 (2)                      | not sig |

Footnote to table S1: BP data are expressed in mmHg as mean (standard deviation).
